# Supplementary material for: Enhanced hyaline cartilage formation and continuous osteochondral regeneration via 3D-Printed heterogeneous hydrogel with multi-crosslinking inks
Source: PubMed Central journal article supplement — Mater Today Bio. 2024 May 3;26:101080. doi: 10.1016/j.mtbio.2024.101080 (PMC11097081; doi:10.1016/j.mtbio.2024.101080), 2024-05-03
Supplement: mmc1.pdf [file mmc1.pdf]

## Supporting Information

### Enhanced Hyaline Cartilage Formation and Continuous Osteochondral Regeneration via 3D-Printed Heterogeneous Hydrogel with Multi-Crosslinking Inks

Zhonglian Wu <sup>a</sup>, Hang Yao <sup>a\*</sup>, Haidi Sun <sup>a</sup>, Zehao Gu <sup>a</sup>, Xu Hu <sup>b</sup>, Jian Yang <sup>c</sup>, Junli Shi <sup>a</sup>, Haojun Yang <sup>d</sup>, Jihang Dai <sup>e</sup>, Hui Chong <sup>a</sup>, Dong-An Wang <sup>b</sup>, Liwei Lin <sup>f,g\*</sup>, Wang Zhang <sup>a,g\*</sup>

<sup>a</sup> School of Chemistry and Chemical Engineering, Yangzhou University, Yangzhou, Jiangsu 225009, P. R. China

<sup>b</sup> Department of Biomedical Engineering, City University of Hong Kong, Kowloon Tong, Hong Kong SAR 999077, P.R. China

<sup>c</sup> Clinical Medical College, Yangzhou University, Yangzhou, Jiangsu 225001, P. R. China.

<sup>d</sup> The Affiliated Changzhou No. 2 People's Hospital of Nanjing Medical University Changzhou, Jiangsu 213004, P. R. China.

<sup>e</sup> Department of Orthopedics and Sports Medicine, Northern Jiangsu People's Hospital, Yangzhou, Jiangsu 225001, P. R. China

<sup>f</sup> School of Petrochemical Engineering, Changzhou University, Changzhou, Jiangsu 213164, P. R. China

<sup>g</sup> Department of Applied Bioengineering, Graduate School of Convergence Science and Technology, Seoul National University, Seoul 08826, Republic of Korea

\*Co-Corresponding Authors:

Hang YAO, Ph.D.

School of Chemistry and Chemical Engineering

Yangzhou University

Yangzhou 225009, P. R. China

Email: yaohang@yzu.edu.cn (H. Yao)

Liwei LIN, Ph.D.

School of Petrochemical Engineering

Changzhou University

Changzhou, 213164, P. R. China

Email: lin-official@snu.ac.kr (L. Lin)

Wang ZHANG, Ph.D.

School of Chemistry and Chemical Engineering

Yangzhou University

Yangzhou 225009, P. R. China

Email: zhangwang@yzu.edu.cn; zhangwang@snu.ac.kr (W. Zhang)

## **Experimental section**

### **Preparation of printing inks**

The main components of the extracellular matrix (ECM) in articular cartilage are proteoglycan and type II collagen. Subchondral bone is mainly composed of type I collagen, proteoglycans, and hydroxyapatite. To accurately simulate osteochondral tissue, sodium alginate (SA) and decellularized natural cartilage(dNC) were chosen as the upper-layer inks. The GelMA, SA, and nano-hydroxyapatite(nHA) were chosen as the lower-layer ink. The following ink ratio was determined according to the relevant literature and the preliminary experiment results [1-5].

**Preparation of the upper-layer inks:** A 5% w/v SA solution was mixed with 0.01, 0.02, and 0.04 mol/L CaCl<sub>2</sub> solution. Meanwhile, 15% w/v dNC (<150 μm) and 5% w/v SA solutions were mixed with 0.01, 0.02, and 0.04 mol/L CaCl<sub>2</sub> solution separately. The prepared solutions were placed in a refrigerator at 4 °C overnight for degassing.

**Preparation of lower-layer inks:** 0.02 mol/L CaCl<sub>2</sub>, 0.5% w/v I-2959, and 5% w/v SA were added to a 10% w/v GelMA solution to obtain Gel-SA solution. Subsequently, 2% (w/v) nHA was added to the Gel-SA solution to obtain the Gel@nHA-SA solution.

### **Cell culture**

Chondrocytes were isolated from porcine articular cartilage tissues according to our previously reported protocol [6]. The cells were then cultured in high-glucose DMEM supplemented with 10% FBS and 1% PS in a cell incubator (5% CO<sub>2</sub>, 37 °C). Passage 2 of the cartilage cells was used in follow-up cell experiments.

Rat bone marrow-derived mesenchymal stem cells (rBMSCs) were isolated by removing the femur ends and flushing the marrow. The cells were cultured in DMEM with low glucose, 10% FBS, and 1% PS in a cell incubator (5% CO<sub>2</sub>, 37 °C). Passages 3 and 4 of the BMSCs were used in this study.

## Supplementary Data

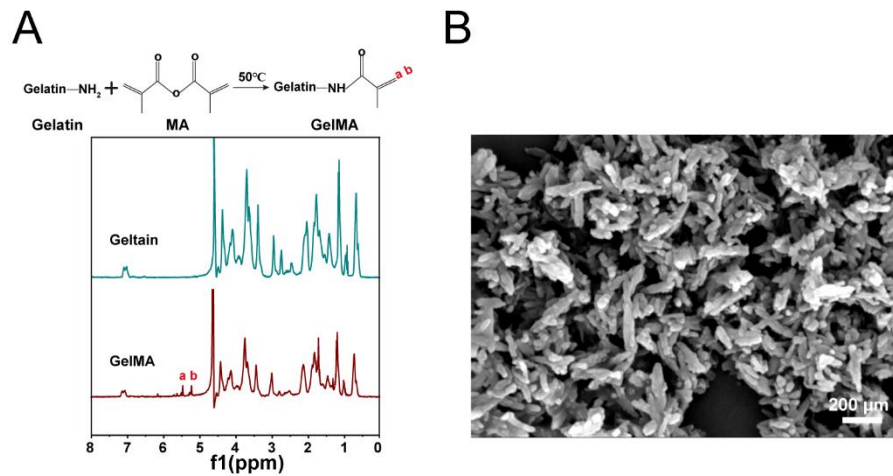

**Figure S1.** A) <sup>1</sup>H-NMR spectra of gelatin and GelMA. The chemical shift between 5 and 6 ppm in the spectrum of GelMA showed the double bond formation. B) The SEM image. Scale bar: 200 nm.

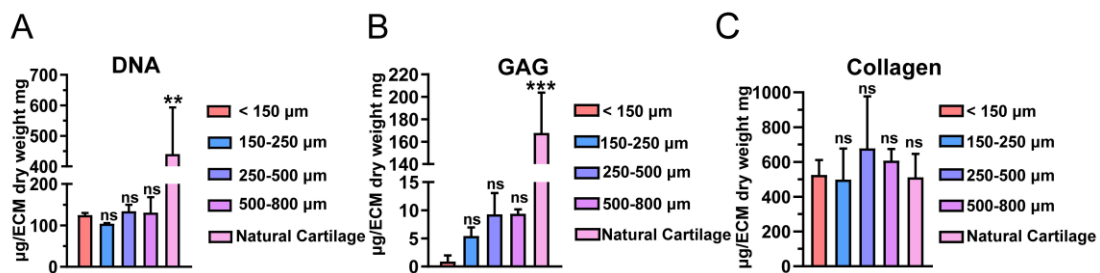

**Figure S2.** Decellularized natural cartilage (dNC) of different sizes is compared with Natural Cartilage (NC). A-C) Quantification of DNA residue, GAG, and total collagen contents in dNC of different sizes and NC. The data were analyzed by one-way ANOVA analysis, and error bars indicate Mean ± SD, \*p<0.05, \*\*p<0.01, \*\*\*p<0.001.

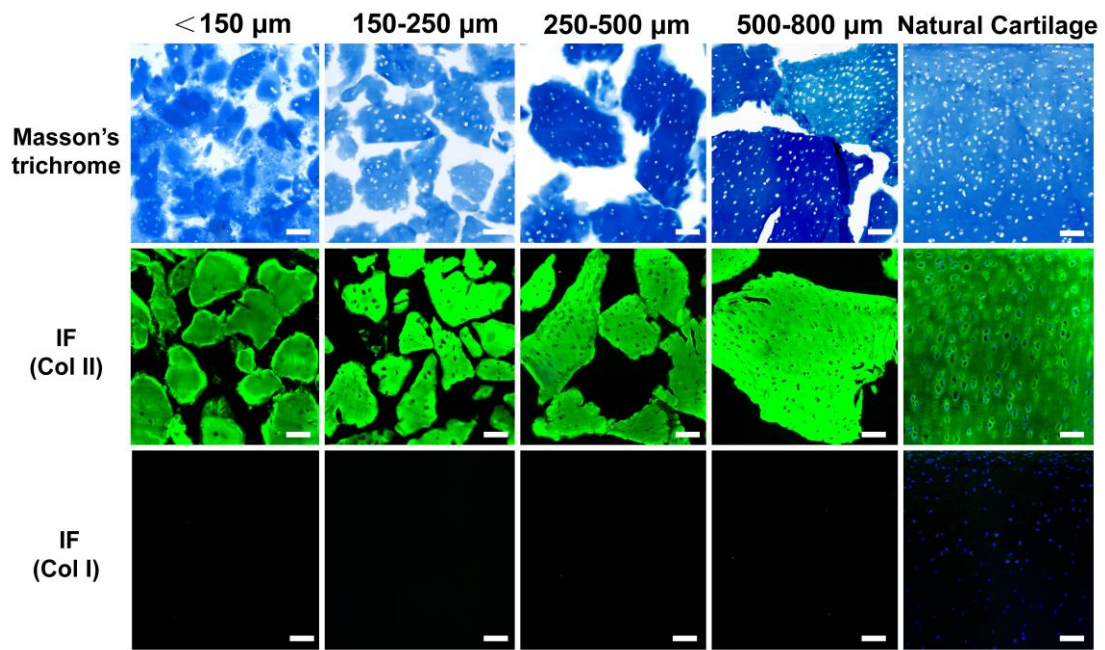

**Figure S3.** Histology of dNC of different sizes and NC was conducted using Masson's trichrome staining and Immunofluorescence (IF) staining with antibodies targeting collagen type II (COL II) and collagen type I (COL I). Positive IF stain manifests as emitting green fluorescence, while positive DAPI staining of cell nuclei is observed as emitting blue fluorescence. Scale bar: 100  $\mu\text{m}$ .

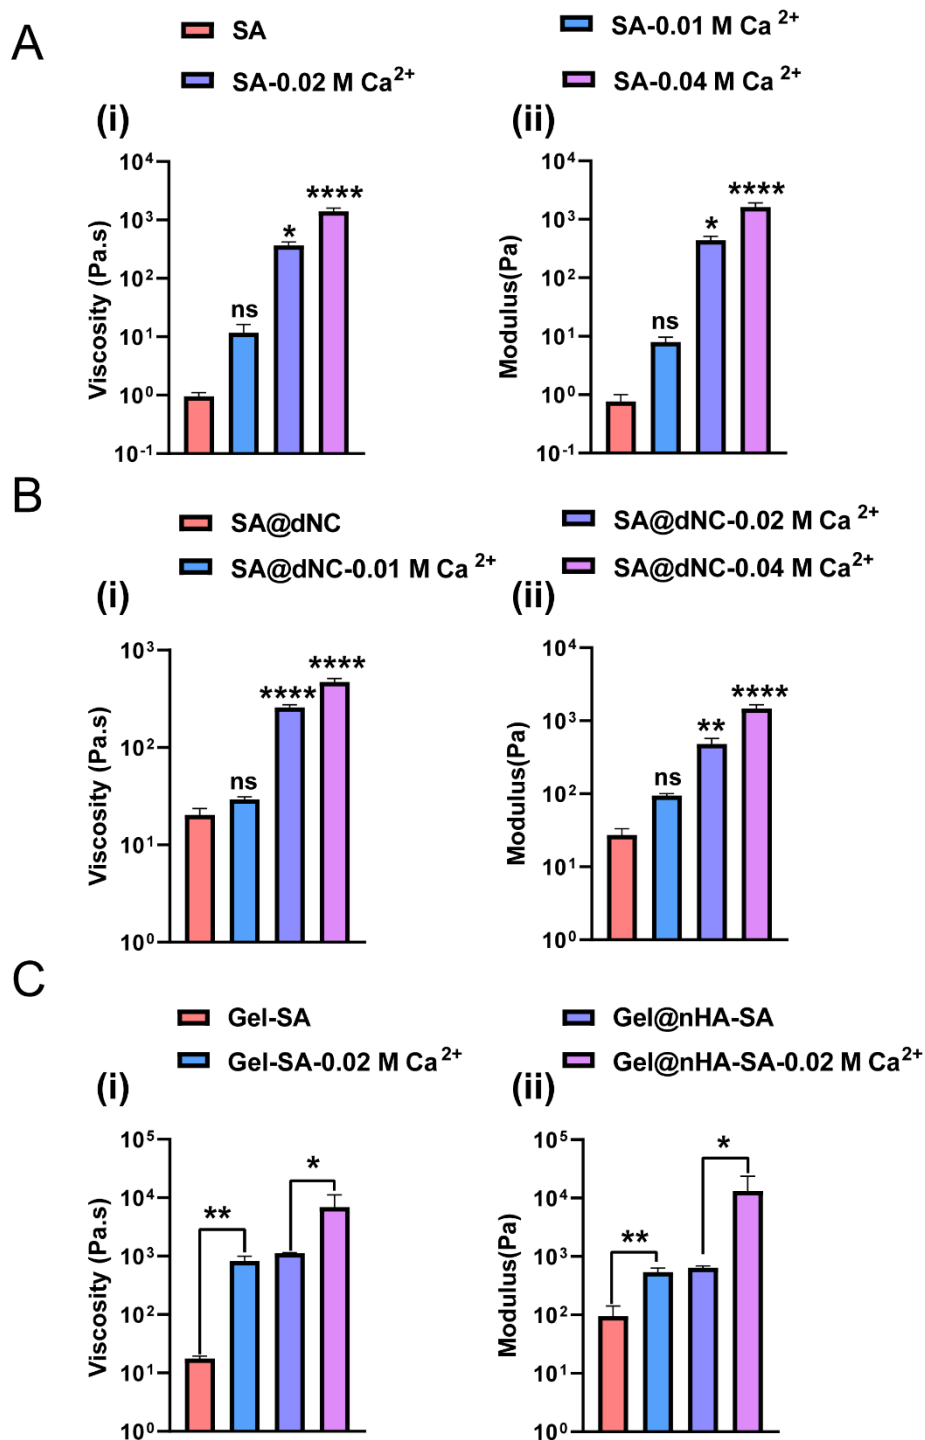

**Figure S4.** Rheological properties of the printing inks. A, B) Viscosity (i) and modulus (ii) of SA and SA@dNC inks with different pre-crosslinking degrees were quantitatively analyzed at 25 °C. C) Viscosity (i) and modulus (ii) of Gel-SA and Gel@nHA-SA inks with different pre-crosslinking degrees were quantitatively analyzed at 37 °C. All data of the viscosity were quantified at share rate of 0.1 1/s. All modulus data represented the storage modulus (G'). The data were analyzed by one-way analysis of variance (ANOVA), and error bars indicate mean ± standard deviation (SD), \*p < 0.05, \*\*p < 0.01, and \*\*\*p < 0.001. “ns” represented no significance.

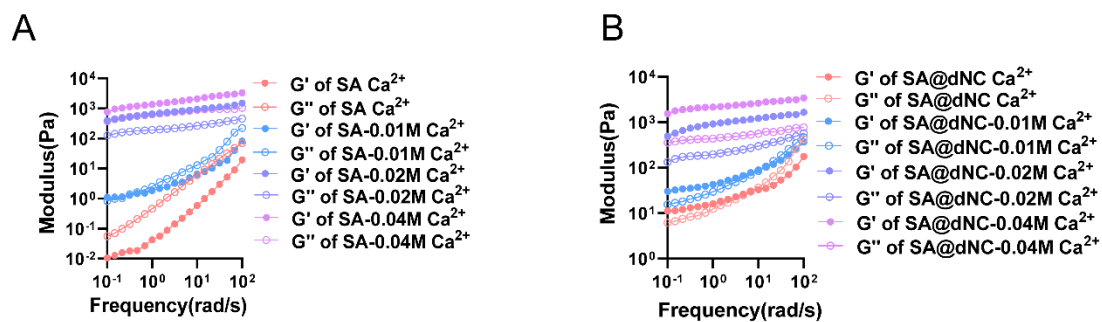

**Figure S5.** Rheological properties of upper layer inks. A-B) Storage modulus( $G'$ ) and loss modulus ( $G''$ ) change of SA and SA@dNC inks of different pre-crosslinking degrees were analyzed over a frequency range of 0.1–100 rad/s at 25°C.

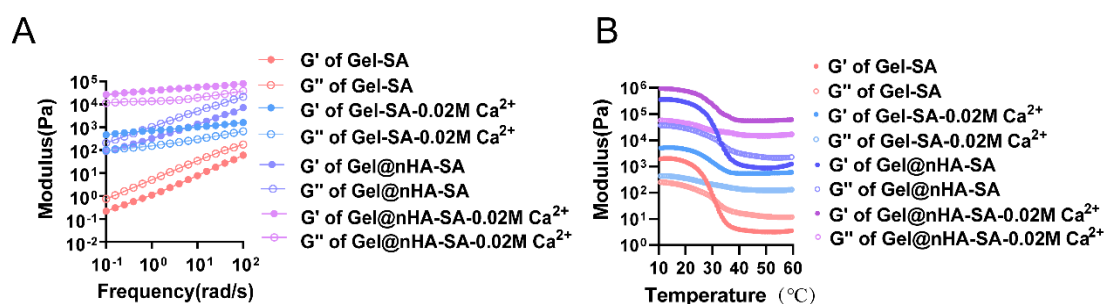

**Figure S6.** Rheological properties of lower layer inks. A)  $G'$  and  $G''$  change of Gel-SA and Gel@nHA-SA inks of different pre-crosslinking degrees were analyzed over a frequency range of 0.1 – 100 rad/s at 37 °C. B)  $G'$  and  $G''$  change of low layer inks of different pre-crosslinking degrees according to the temperature range of 10 – 60 °C.

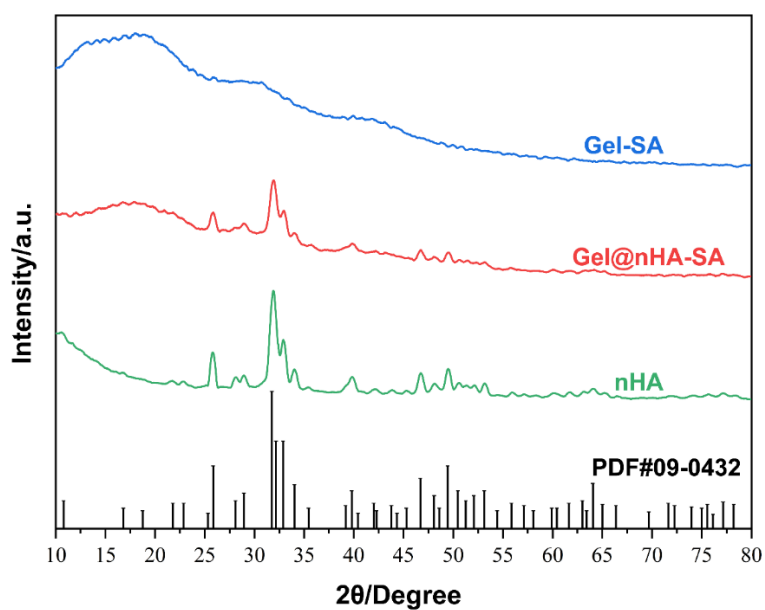

**Figure S7.** XRD image of lower layer hydrogel (Gel-SA, Gel@nHA-SA) inks.

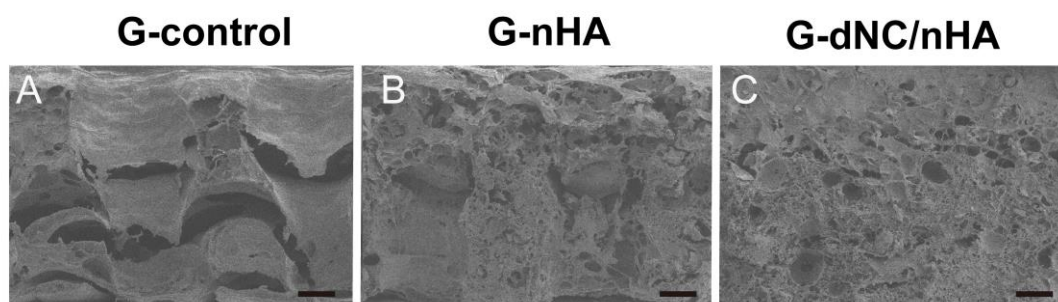

**Figure S8.** The cross-section SEM images of the bilayer hydrogel scaffold. Scale bar: 100  $\mu\text{m}$ .



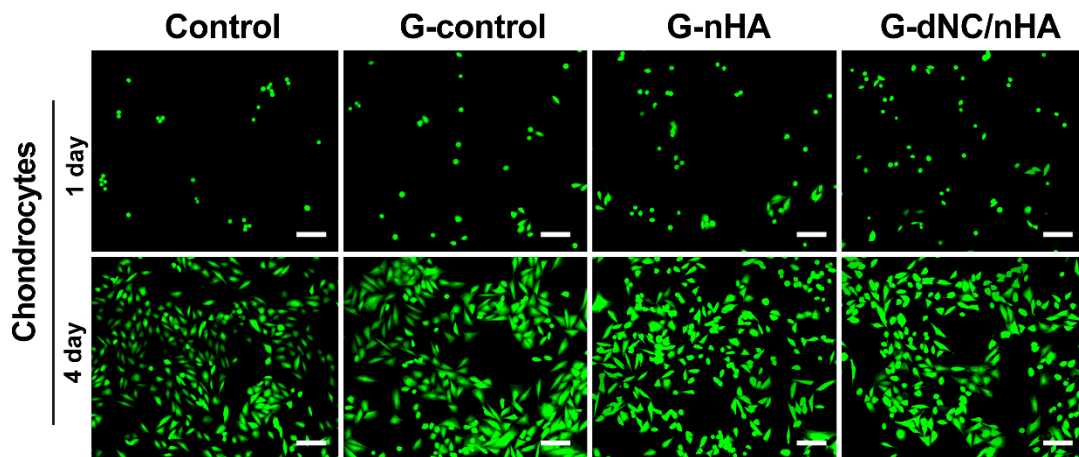

**Figure S9.** Images of Live/Dead staining were captured after co-culturing Chondrocytes with various samples for 1 and 4 days. (Live cells: green fluorescence, dead cells: red fluorescence. Scale bar:100  $\mu$ m).

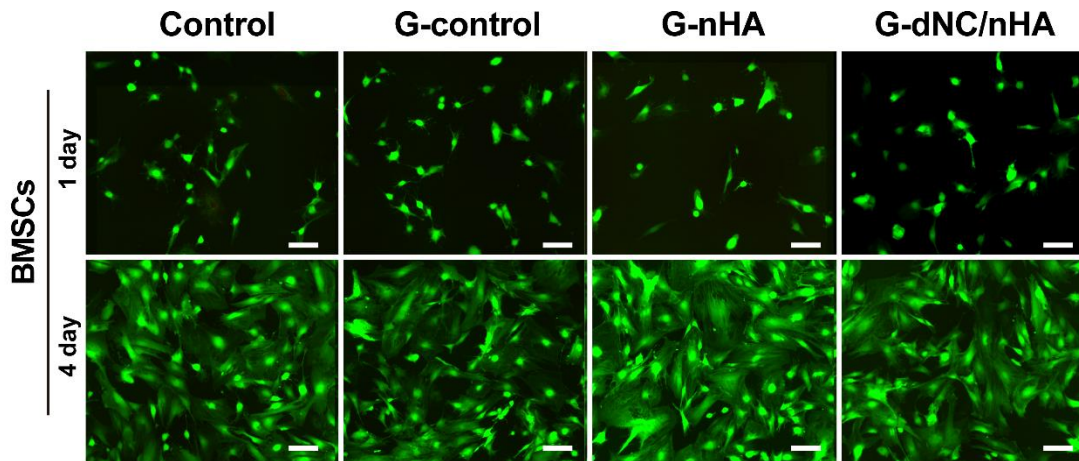

**Figure S10.** Images of Live/Dead staining were captured after co-culturing BMSCs with various samples for 1 and 4 days. (Live cells: green fluorescence, dead cells: red fluorescence. Scale bar:100  $\mu$ m).

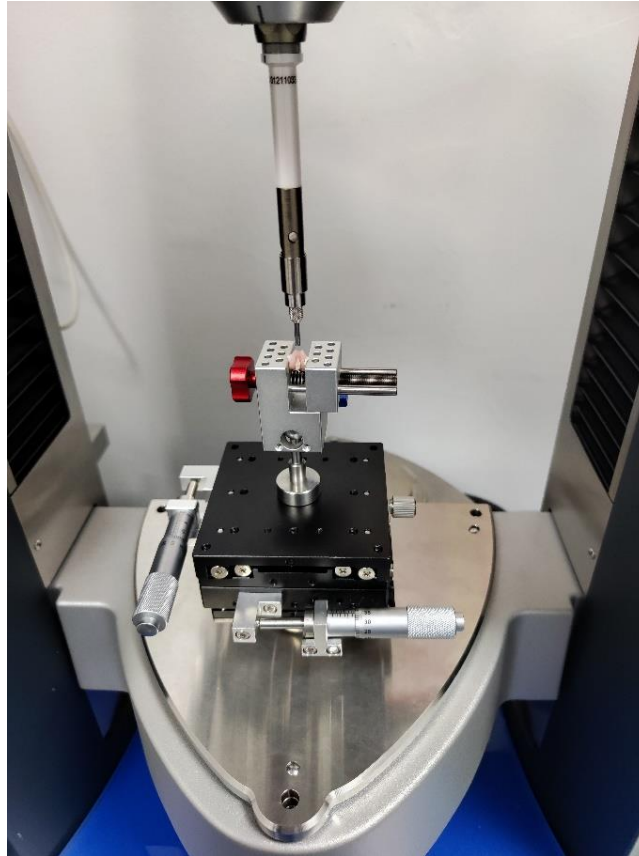

**Figure S11.** The image of mechanical test equipment of normal and repaired cartilage.

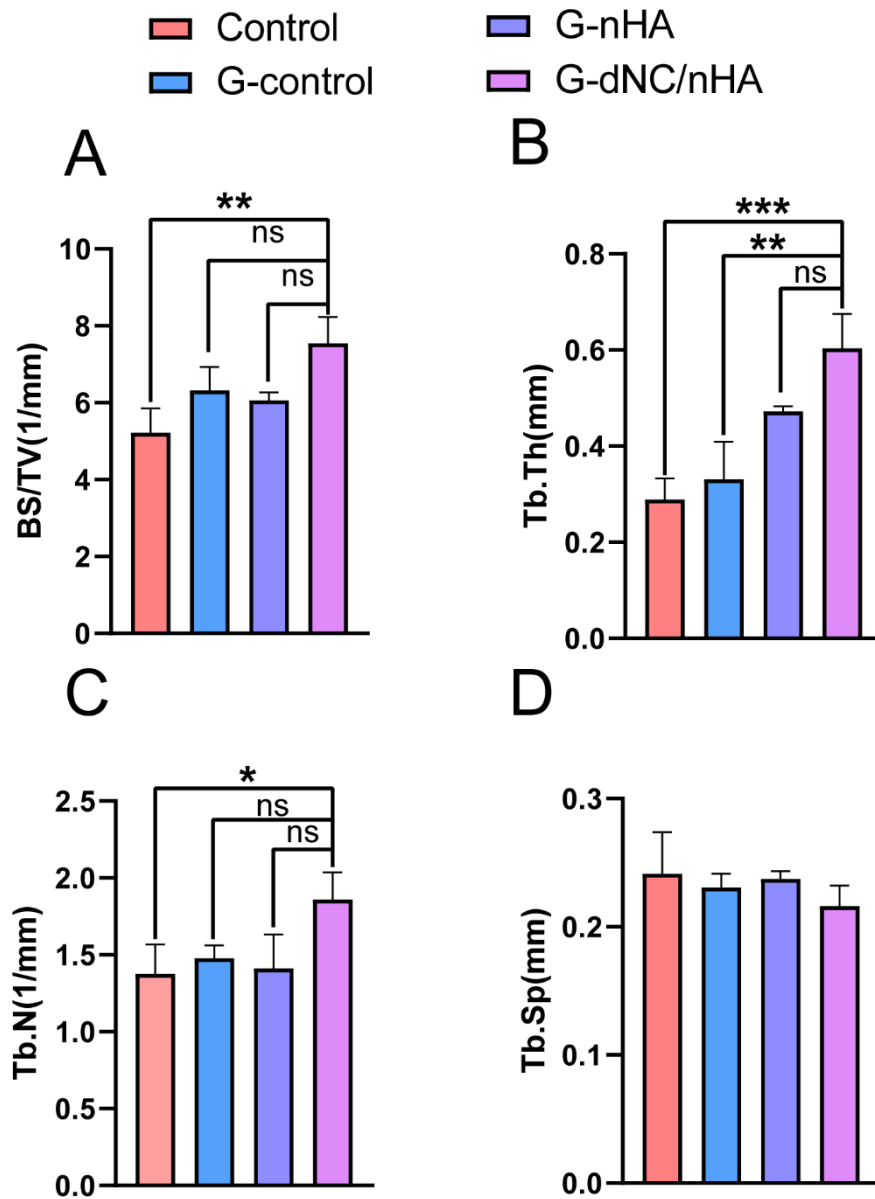

**Figure S12** A–D) Images of bone surface fraction (BS/TV), trabecular thickness (Tb.Th), trabecular number (Tb.N), and trabecular separation (Tb.Sp) (n=3). All data were analyzed by one-way ANOVA, and error bars indicate mean  $\pm$  SD, \*p < 0.05, \*\*p < 0.01, and \*\*\*p < 0.001. “ns” represents no significance.

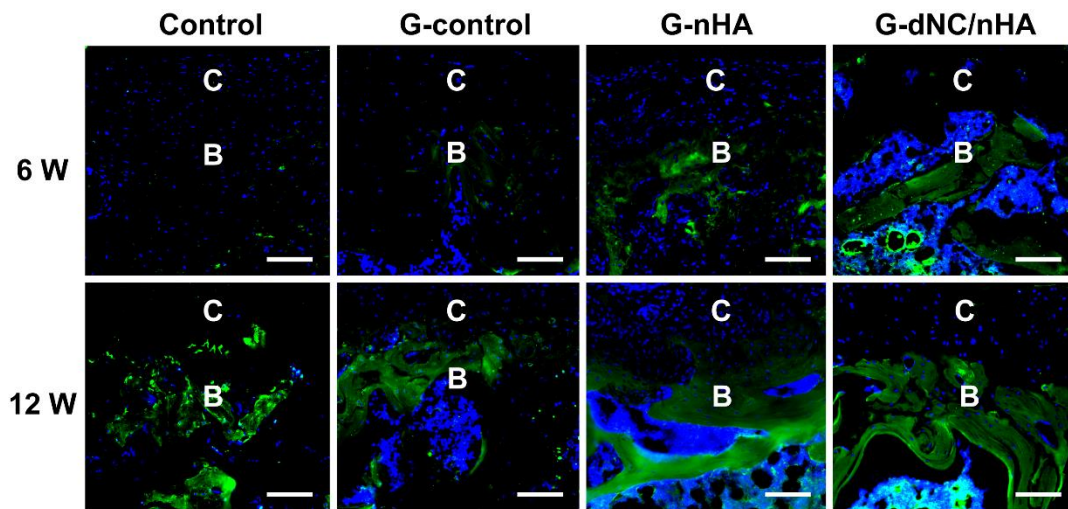

**Figure S13.** Immunofluorescence (IF) images of osteocalcin (OCN, green) of the repaired tissue at 6 and 12 weeks. C: cartilage; B: bone. Scare bar: 100  $\mu$ m.

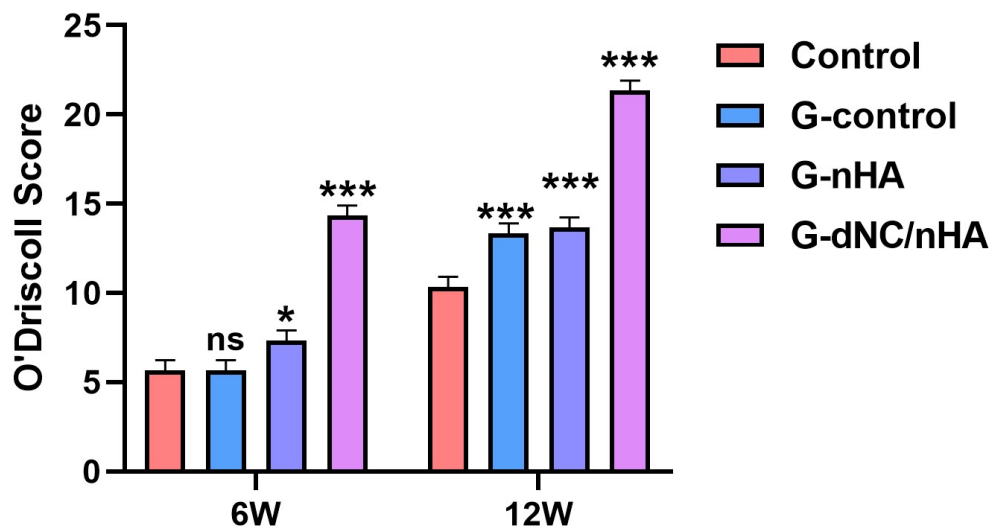

**Figure S14.** According to the O'Driscoll scoring criteria, histological repair scores were analyzed to assess the effectiveness of cartilage repair in each study group at 6 and 12 weeks. The data were analyzed by one-way ANOVA analysis, and error bars indicate Mean  $\pm$  SD, \* $p$ <0.05, \*\* $p$ <0.01, \*\*\* $p$ <0.001. "ns" represented no significance.

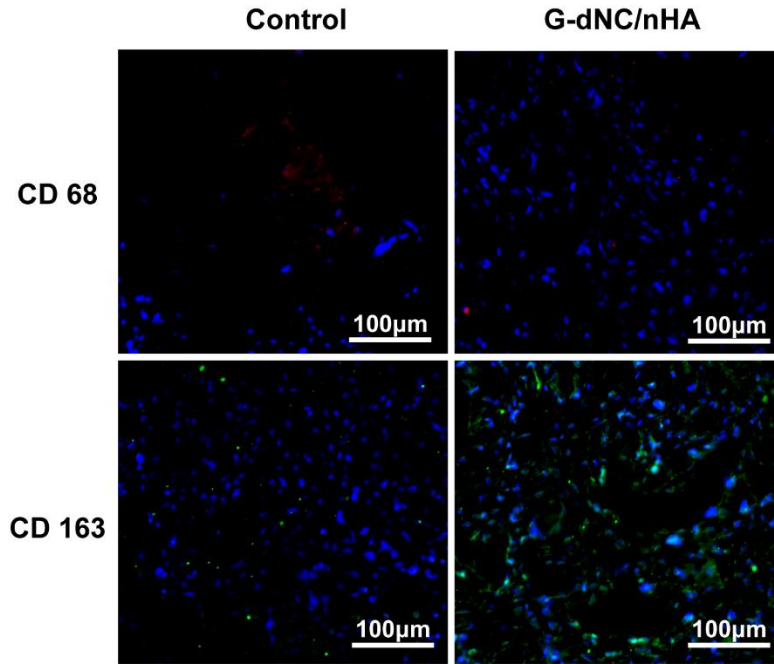

**Figure S15.** Immunofluorescence staining of macrophage (CD68 red), type 2 macrophage (CD163 green), and DAPI (blue) was utilized to assess the inflammatory and immunomodulatory effects of G-dNC/nHA scaffolds. Scale bar: 100 μm.

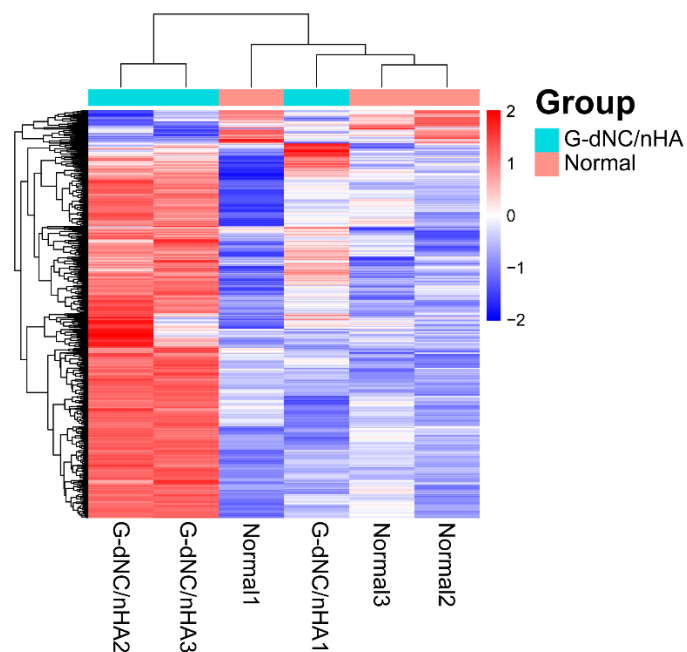

**Figure S16.** heatmap of the differentially expressed genes (DEGs) in the G-dNC/nHA group and the normal group.

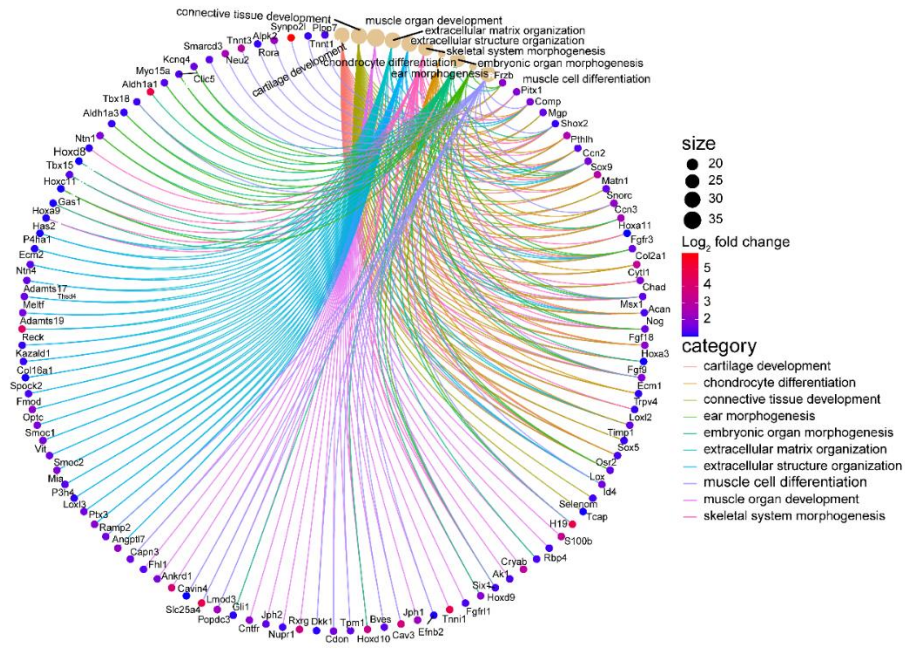

**Figure S17.** The circular plot of DEGs is mainly associated with the biological process of cartilage development, chondrocyte differentiation, and extracellular matrix organization.

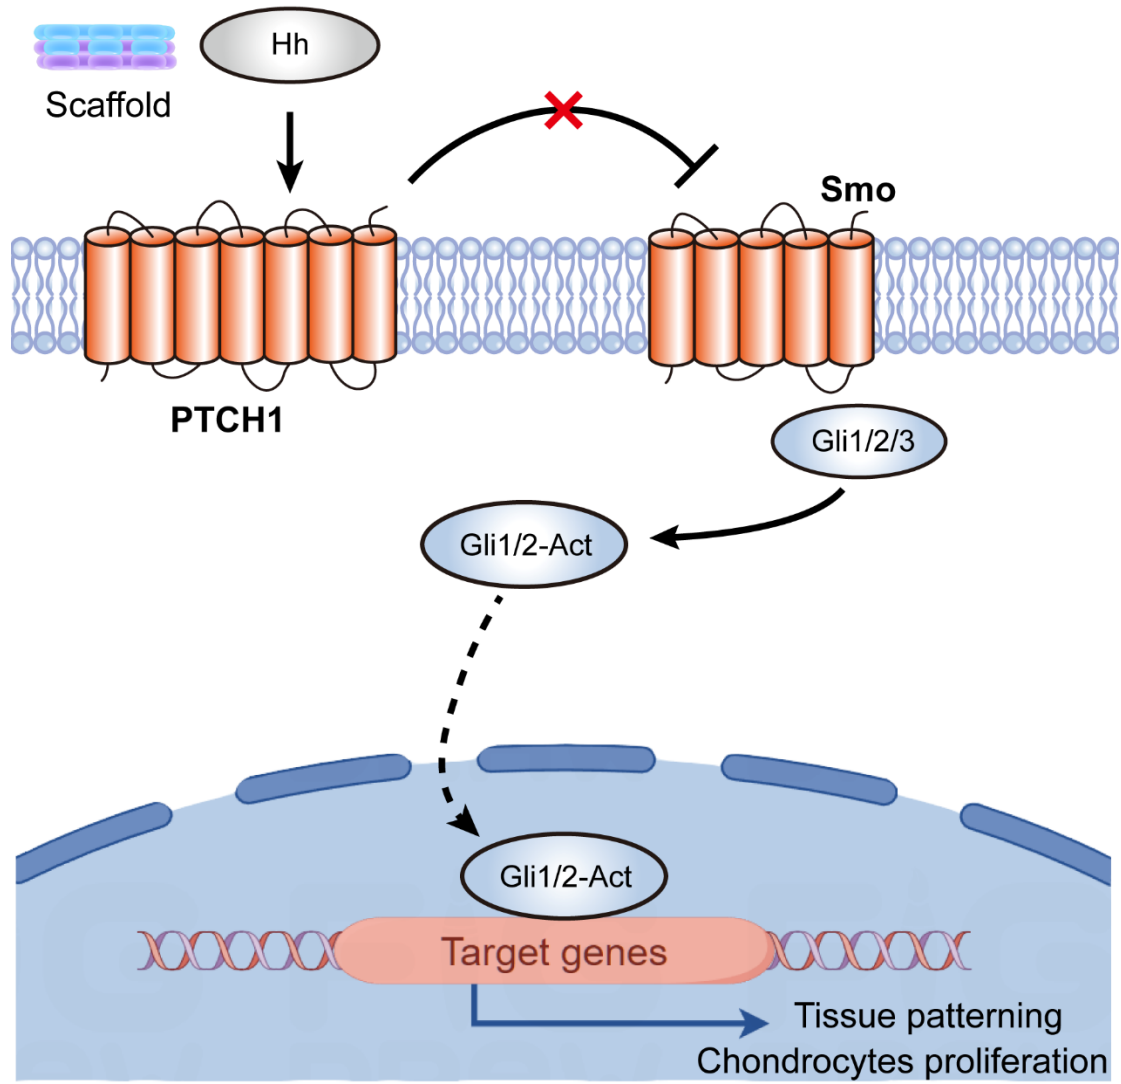

**Figure S18.** The G-dNC/nHA scaffold promoted osteochondral defect regeneration via activating the Hedgehog signaling pathway. The picture material of the cell nuclear was drawn by Figdraw.

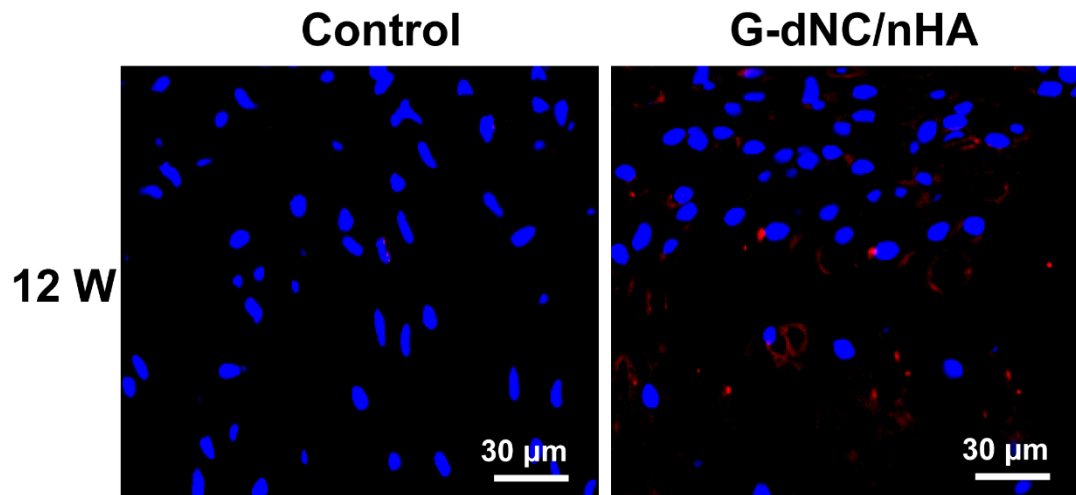

**Figure S19.** IF images of Gli1 (red) of the repaired tissue at 12 weeks. Scare bar: 100  $\mu$ m.

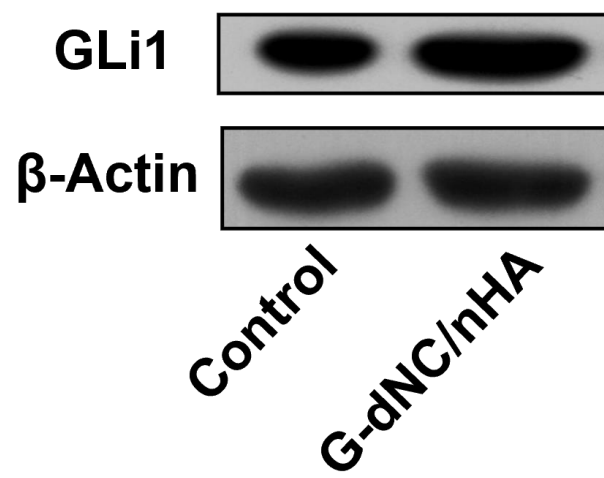

**Figure S20** Western blot of Gli1 in Control and G-dNC/nHA groups.



**Table S1. 3D printing parameters**

| Parameters                                       | Value     |
|--------------------------------------------------|-----------|
| Nozzle temperature of upper layer inks           | 25 °C     |
| Extrusion pressure of upper inks                 | 5-8 psi   |
| Nozzle temperature of lower layer inks           | 37 °C     |
| Extrusion pressure of upper inks                 | 15-20 psi |
| Printing speed                                   | 3 mm/s    |
| Height of upper layer inks                       | 0.5 mm    |
| Height of calcified layer (cross-printing layer) | 0.5 mm    |
| Height of lower layer inks                       | 1 mm      |

**Tabel S2. Primer sequences of chondrogenic genes.**

| Gene   | Primers                |                        |
|--------|------------------------|------------------------|
|        | Forward (5'-3')        | Reverse (5'-3')        |
| RPL4   | AGACAATGCGCCGAAACA     | TACCACGGGCTTCTTGTCT    |
| Col I  | AAGATGTGCCACTCCGACT    | AAGATGTGCCACTCCGACT    |
| Col II | ATGGCTGCACGAAACACA     | ATGGCTGCACGAAACACA     |
| Col X  | CAGGTACCAGAGGTCCCATC   | CAGGTACCAGAGGTCCCATC   |
| ACAN   | CGAGGAGCAGGAGTTTGTCAAC | ATCATCACCACGCAGTCCTCTC |

**Tabel S3. Primer sequences of osteogenic genes.**

| Gene  | Primers                |                        |
|-------|------------------------|------------------------|
|       | Forward (5'-3')        | Reverse (5'-3')        |
| GAPDH | AAGAAACCCTGGACCACCAGC  | TGGTATTCGAGAGAAGGGAGGG |
| ALP   | CCCGAGTGCTTTGTGTGTGCTG | CCGCCGGTGTTCGTGTGTG    |
| RUNX2 | TCTTCCCAAAGCCAGAGCG    | TGCCATTCGAGGTGGTCG     |
| Col I | CTCCTGGCAAGAACGGAGATGA | CTCCTTTGGCACCATCCAAACC |
| OPN   | TTGGCTTTGCAGTCTCCTGCGG | AGGCAAGGCCGAACAGGCAAA  |
| OCN   | CAGTAAGGTGGTGAATAGACT  | GGTGCCATAGATGCGCTTG    |

**Table S4. ICRS macroscopic evaluation of cartilage repair**

| <b>Categories</b>                                                                    | <b>Points</b> |
|--------------------------------------------------------------------------------------|---------------|
| <b>Degree of defect repair</b>                                                       |               |
| In level with surrounding cartilage                                                  | 4             |
| 75% repair of defect depth                                                           | 3             |
| 50% repair of defect depth                                                           | 2             |
| 25% repair of defect depth                                                           | 1             |
| 0% repair of defect depth                                                            | 0             |
| <b>Integration to border zone</b>                                                    |               |
| Complete integration with surrounding cartilage                                      | 4             |
| Demarcating border < 1 mm                                                            | 3             |
| 3/4 of graft integrated, 1/4 with a notable border > 1 mm width                      | 2             |
| 1/2 of graft integrated with surrounding cartilage, 1/2 with a notable border > 1 mm | 1             |
| From no contact to 1/4 of graft integrated with surrounding cartilage                | 0             |
| <b>Macroscopic appearance</b>                                                        |               |
| Intact smooth surface                                                                | 4             |
| Fibrillated surface                                                                  | 3             |
| Small, scattered fissures or cracks                                                  | 2             |
| Several, small or few but large fissures                                             | 1             |
| Total degeneration of grafted area                                                   | 0             |
| <b>Overall repair assessment</b>                                                     |               |
| Grade I: normal                                                                      | 12            |
| Grade II: nearly normal                                                              | 8-11          |
| Grade III: abnormal                                                                  | 4-7           |
| Grade IV: severely abnormal                                                          | 1-3           |

**Table S5. O'Driscoll scoring system**

| (a) Nature of the predominant tissue                             | Score |
|------------------------------------------------------------------|-------|
| <b>1 Cellular morphology</b>                                     |       |
| Hyaline articular cartilage                                      | 4     |
| Incompletely differentiated mesenchyme                           | 2     |
| Fibrous tissue or bone                                           | 0     |
| <b>2 Safranin-O staining of the matrix</b>                       |       |
| Normal or nearly normal                                          | 3     |
| Moderate                                                         | 2     |
| Slight                                                           | 1     |
| None                                                             | 0     |
| <b>(b)Structural characteristics</b>                             |       |
| <b>3 Surface regularity</b>                                      |       |
| Smooth and intact                                                | 3     |
| Superficial horizontal lamination                                | 2     |
| Fissures - 25 to 100 per cent of the thickness                   | 1     |
| Severe disruption. including fibrillation                        | 0     |
| <b>4 Structural integrity</b>                                    |       |
| Normal                                                           | 2     |
| Slight disruption including cysts                                | 1     |
| Severe disintegration                                            | 0     |
| <b>5 Thickness</b>                                               |       |
| 100 per cent of normal adjacent cartilage                        | 2     |
| 50-100 per cent of normal cartilage                              | 1     |
| 0-50 per cent of normal cartilage                                | 0     |
| <b>6 Bonding to the adjacent cartilage</b>                       |       |
| Bonded at both ends of graft                                     | 2     |
| Bonded at one end, or partially at both ends                     | 1     |
| Not bonded                                                       | 0     |
| <b>(c)Freedom from cellular changes of degeneratio</b>           |       |
| <b>7 Hypocellularity</b>                                         |       |
| Normal cellularity                                               | 3     |
| Slight hypocellularity                                           | 2     |
| Moderate hypocellularity                                         | 1     |
| Severe hypocellularity                                           | 0     |
| <b>8 Chondrocyte clustering</b>                                  |       |
| No clusters                                                      | 2     |
| <25 per cent of the cells                                        | 1     |
| 25-100 per cent of the cells                                     | 0     |
| <b>9 Freedom from degenerative changes in adjacent cartilage</b> |       |
| Normal cellularity.no clusters, normal staining                  | 3     |
| Normal cellularity.no clusters, normal staining                  | 2     |
| Mild or moderate hypocellularity, slight staining                | 1     |
| Severe hypocellularity. poor or no staining                      | 0     |

## Reference

- [1] F.H. Chen, K.T. Rousche, R.S. Tuan, Technology Insight: adult stem cells in cartilage regeneration and tissue engineering, *Nature Clinical Practice Rheumatology* 2(7) (2006) 373-382. <https://doi.org/10.1038/ncprheum0216>.
- [2] Y. Liu, M.B. Chan-Park, A biomimetic hydrogel based on methacrylated dextran-graft-lysine and gelatin for 3D smooth muscle cell culture, *Biomaterials* 31(6) (2010) 1158-1170. <https://doi.org/https://doi.org/10.1016/j.biomaterials.2009.10.040>.
- [3] J. Gao, X. Ding, X. Yu, X. Chen, X. Zhang, S. Cui, J. Shi, J. Chen, L. Yu, S. Chen, J. Ding, Cell-Free Bilayered Porous Scaffolds for Osteochondral Regeneration Fabricated by Continuous 3D-Printing Using Nascent Physical Hydrogel as Ink, *Advanced Healthcare Materials* 10(3) (2021) 2001404. <https://doi.org/https://doi.org/10.1002/adhm.202001404>.
- [4] J. Liu, L. Li, H. Suo, M. Yan, J. Yin, J. Fu, 3D printing of biomimetic multi-layered GelMA/nHA scaffold for osteochondral defect repair, *Materials & Design* 171 (2019) 107708. <https://doi.org/https://doi.org/10.1016/j.matdes.2019.107708>.
- [5] W. Wei, H. Dai, Articular cartilage and osteochondral tissue engineering techniques: Recent advances and challenges, *Bioactive Materials* 6(12) (2021) 4830-4855. <https://doi.org/https://doi.org/10.1016/j.bioactmat.2021.05.011>.
- [6] H. Yao, T. Li, Z. Wu, Q. Tao, J. Shi, L. Liu, Y. Zhao, Superlarge living hyaline cartilage graft contributed by the scale-changed porous 3D culture system for joint defect repair, *Biomedical Materials* 17(6) (2022) 064101. <https://doi.org/10.1088/1748-605X/ac8a31>.
